# Supplementary material for: Deposition of Nanosized Amino Acid Functionalized Bismuth Oxido Clusters on Gold Surfaces
Source: MDPI journal article supplement (doi:10.3390/nano12111815), 2022-05-26
Supplement: s1 [file s1]

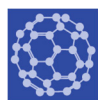

# Deposition of Nanosized Amino Acid Functionalized Bismuth Oxide Clusters on Gold Surfaces

Annika Morgenstern <sup>1</sup>, Rico Thomas <sup>2</sup>, Apoorva Sharma <sup>1</sup>, Marcus Weber <sup>2,3</sup>, Oleksandr Selyshchev <sup>1</sup>, Ilya Milekhin <sup>1</sup>, Doreen Dentel <sup>4</sup>, Sibylle Gemming <sup>3,5</sup>, Christoph Tegenkamp <sup>4</sup>, Dietrich R. T. Zahn <sup>1,3</sup>, Michael Mehring <sup>2,3,\*</sup> and Georgeta Salvan <sup>1,3,\*</sup>

<sup>1</sup> Semiconductor Physics, Institute of Physics, Chemnitz University of Technology, 09107 Chemnitz, Germany;

annika.morgenstern@physik.tu-chemnitz.de (A.M.); apoorva.sharma@physik.tu-chemnitz.de (A.S.);  
oleksandr.selyshchev@physik.tu-chemnitz.de (O.S.); ilya.milekhin@physik.tu-chemnitz.de (I.M.);  
zahn@physik.tu-chemnitz.de (D.R.T.Z.)

<sup>2</sup> Coordination Chemistry, Institute of Chemistry, Chemnitz University of Technology, 09107 Chemnitz, Germany; rico.thomas@s2013.tu-chemnitz.de (R.T.); marcus.weber@chemie.tu-chemnitz.de (M.W.)

<sup>3</sup> Center of Materials, Architectures and Integration of Nanomembranes, Chemnitz University of Technology, 09126 Chemnitz, Germany; sibylle.gemming@physik.tu-chemnitz.de

<sup>4</sup> Solid Surface Analysis, Institute of Physics, Chemnitz University of Technology, 09107 Chemnitz, Germany; doreen.dentel@physik.tu-chemnitz.de (D.D.); christoph.tegenkamp@physik.tu-chemnitz.de (C.T.)

<sup>5</sup> Theoretical Physics of Quantum Mechanical Processes and Systems, Institute of Physics, Chemnitz University of Technology, 09107 Chemnitz, Germany

\* Correspondence: michael.mehring@chemie.tu-chemnitz.de (M.M.); salvan@physik.tu-chemnitz.de (G.S.)

**Citation:** Morgenstern, A.; Thomas, R.; Sharma, A.; Weber, M.; Selyshchev, O.; Milekhin, I.; Dentel, D.; Gemming, S.; Tegenkamp, C.; Zahn, D.R.T.; et al. Deposition of Nanosized Amino Acid Functionalized Bismuth Oxide Clusters on Gold Surfaces. *Nanomaterials* **2022**, *12*, 1815. <https://doi.org/10.3390/nano12111815>

Academic Editor(s): Valentin Craciun, Felicia Iacomini and Romulus Tetea

Received: 5 April 2022

Accepted: 19 May 2022

Published: 26 May 2022

**Publisher's Note:** MDPI stays neutral with regard to jurisdictional claims in published maps and institutional affiliations.

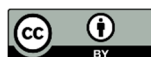

Copyright: © 2022 by the authors. Licensee MDPI, Basel, Switzerland. This article is an open access article distributed under the terms and conditions of the Creative Commons Attribution (CC BY) license (<https://creativecommons.org/licenses/by/4.0/>).

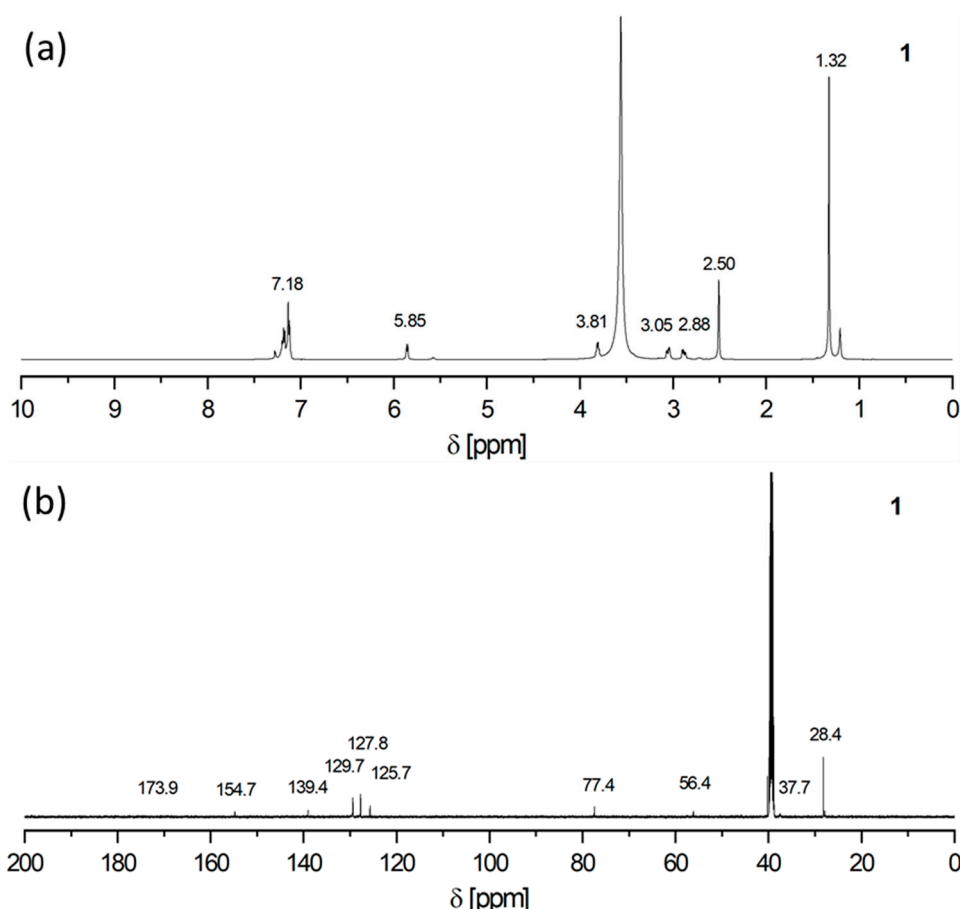

**Figure S1.** (a) <sup>1</sup>H NMR spectra (500.3 MHz, 298 K) of **1** in dms<sub>o</sub>-d<sub>6</sub>. (b) <sup>13</sup>C NMR spectra (125.8 MHz, 298 K) of **1** in dms<sub>o</sub>-d<sub>6</sub>.

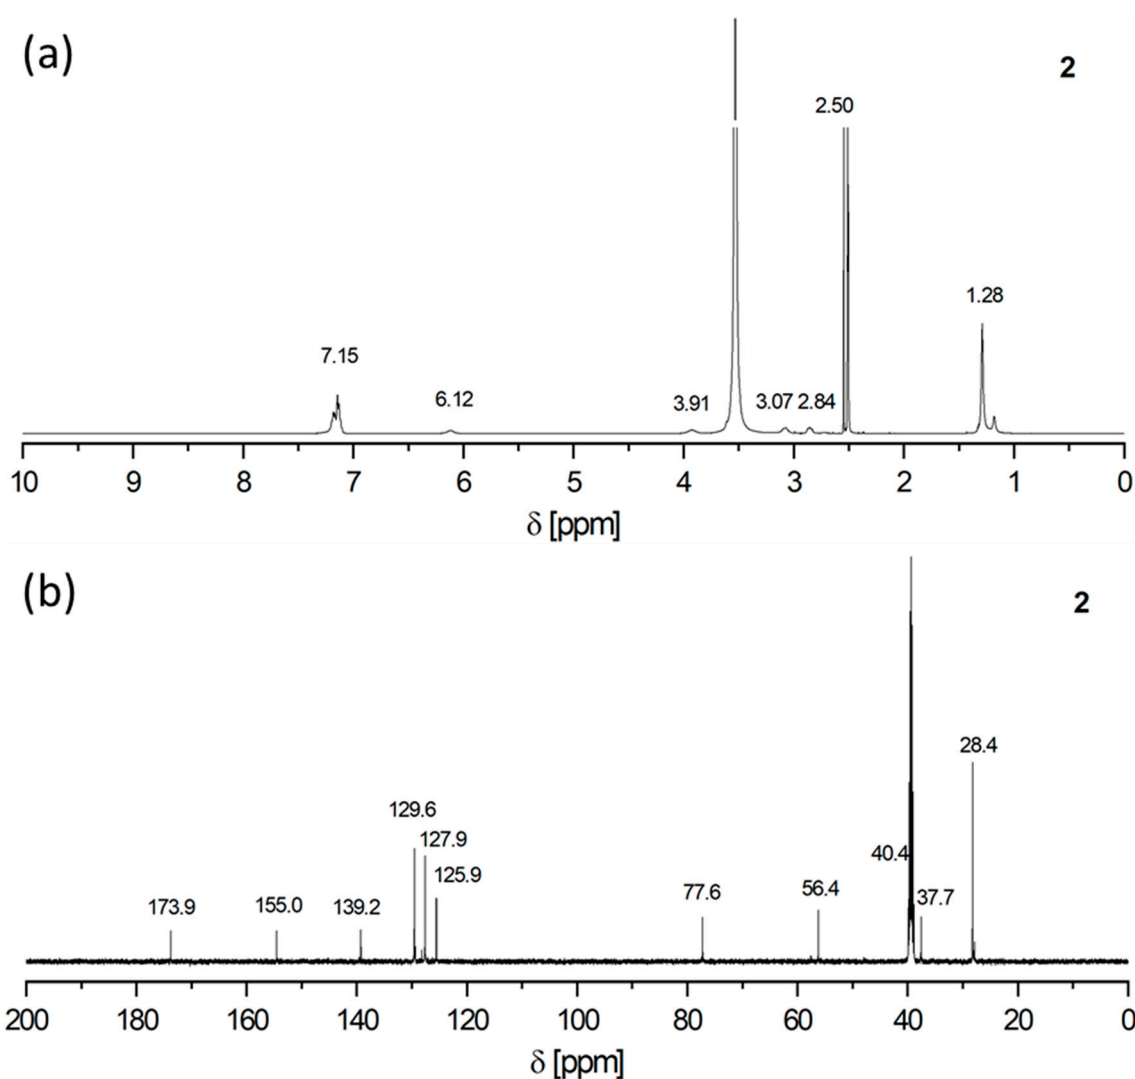

**Figure S2.** (a)  $^1\text{H}$  NMR spectra (500.3 MHz, 298 K) of **2** in  $\text{dmsO-d}_6$ . (b)  $^{13}\text{C}$  NMR spectra (125.8 MHz, 298 K) of **2** in  $\text{dmsO-d}_6$ .

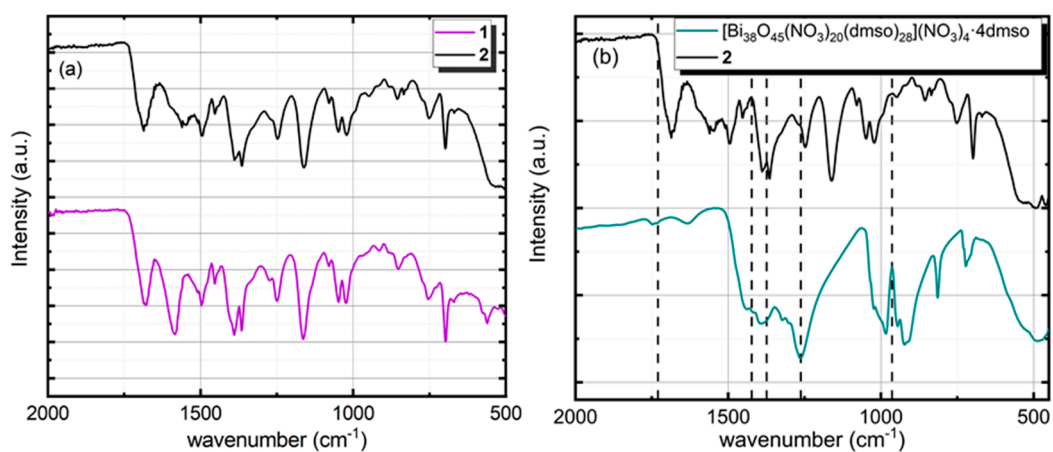

**Figure S3.** (a) FTIR spectra of Boc-Phe sodium salt (**1**, violet) and  $[\text{Bi}_{38}\text{O}_{45}(\text{Boc-Phe-O})_{24}(\text{dmsO})_9]$  (**2**, black) powder, (b) FTIR spectra of  $[\text{Bi}_{38}\text{O}_{45}(\text{NO}_3)_{20}(\text{dmsO})_{28}](\text{NO}_3)_4 \cdot 4\text{dmsO}$  (**A**, green) and  $[\text{Bi}_{38}\text{O}_{45}(\text{Boc-Phe-O})_{24}(\text{dmsO})_9]$  (**2**, black) powder.

**Table S1.** FTIR vibration modes of  $[\text{Bi}_{38}\text{O}_{45}(\text{NO}_3)_{20}(\text{dmsO})_{28}](\text{NO}_3)_4 \cdot 4\text{dmsO}$  **A** associated with the FTIR spectrum in Figure S3(b).

| Mode                                  | Wavenumber / $\text{cm}^{-1}$ |
|---------------------------------------|-------------------------------|
| $\nu_{\text{sym. mono}}(\text{NO}_2)$ | 995                           |
| $\nu_{\text{sym. bi}}(\text{NO}_2)$   | 1265                          |
| $\nu_{\text{as. bi}}(\text{NO}_2)$    | 1380                          |
| $\nu_{\text{as. mono}}(\text{NO}_2)$  | 1420                          |
| $\nu(\text{N}=\text{O})$              | 1735                          |

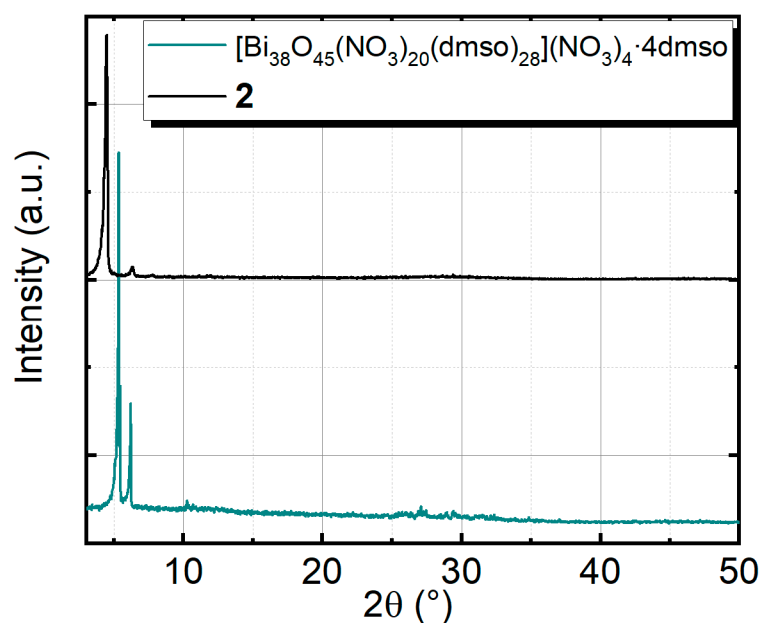**Figure S4.** PXRD pattern of  $[\text{Bi}_{38}\text{O}_{45}(\text{NO}_3)_{20}(\text{dmsO})_{28}](\text{NO}_3)_4 \cdot 4\text{dmsO}$  (**A**, green) and  $[\text{Bi}_{38}\text{O}_{45}(\text{Boc-Phe-O})_{24}(\text{dmsO})_9]$  powder (**2**, black).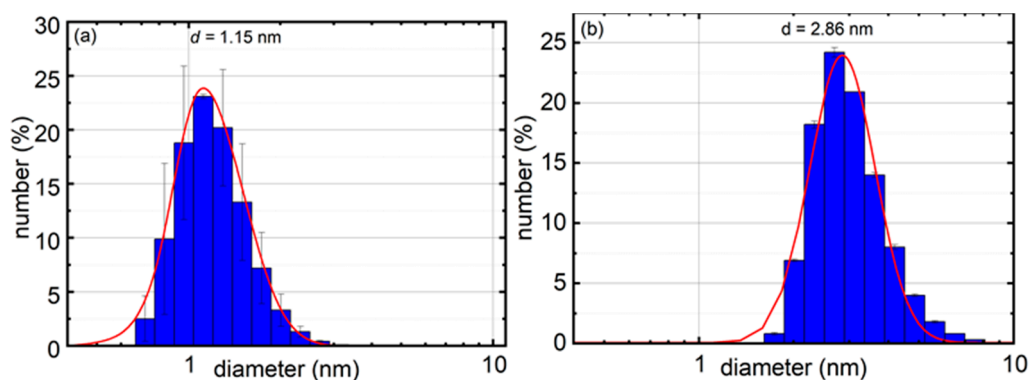

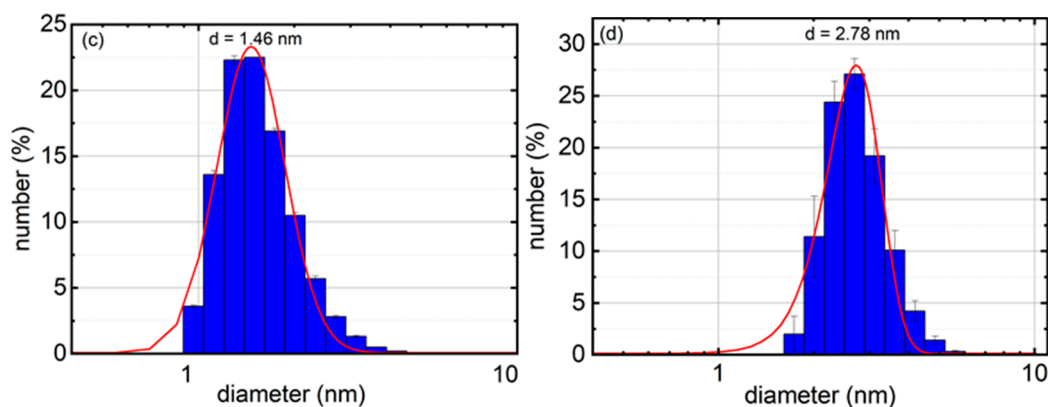

**Figure S5.** Exemplary particle size distribution (PSD) of  $[\text{Bi}_{38}\text{O}_{45}(\text{NO}_3)_{20}(\text{dmsO})_{28}](\text{NO}_3)_4 \cdot 4\text{dmsO}$  (**A**) (a) and **2** in dmsO (b), in acetonitrile (c) and in ethanol (d). The data for PSD curve of **A** were used with permission from ref [63].

**Table S2.** FTIR vibration modes of **2** associated with FTIR spectrum in Figure 1 and Figure S6 (a) **2**, (b) **2**-DrA, (c) **2**-DrE, (d) **2**-SpA and (e) **2**-SpE (f) **2**-DrA-2 (g) **2**-DrE-2 (values given in  $\text{cm}^{-1}$ ).

| Mode                                              | (a)       | (b)       | (c)       | (d)       | (e)       | (f)       | (g)       |
|---------------------------------------------------|-----------|-----------|-----------|-----------|-----------|-----------|-----------|
| $\nu \text{ Bi-O}$                                | 582       | 576       | 583       | 575       | 577       | 575       | 575       |
| $\delta_{\text{monosubst. Aromat}}$               | 699,753   | 699,752   | 701,754   | 699,752   | 700,752   | 699,753   | 702,753   |
| $\nu \text{ S=O}$                                 | 948       | 946       | 945       | 947       | 947       | 947       | 947       |
| $\delta_{\text{C-H}}(\text{C}=\text{C}-\text{H})$ | 1018      | 1021      | 1026      | 1021      | 1022      | 1022      | 1022      |
| $\nu_{\text{C-N}} / \nu_{\text{C-O}}$             | 1047,1162 | 1050,1165 | 1053,1170 | 1050,1162 | 1051,1164 | 1051,1165 | 1051,1165 |
| $\nu_{\text{C-O-C}}$                              | 1246      | 1246      | 1251      | 1247      | 1247      | 1247      | 1247      |
| $\delta_{\text{C-H}}(\text{CH}_3)$                | 1363,386  | 1364,1387 | 1368,1393 | 1363,1389 | 1365,1389 | 1365,1387 | 1367,1387 |
| $\nu_{\text{C=O}}$<br>carboxylate                 | 1465,1554 | 1495,1553 | 1497,1559 | 1495,1554 | 1496,1556 | 1496,1553 | 1496,1557 |
| $\nu_{\text{C=O}}$ amide                          | 1688      | 1685      | 1694      | 1689      | 1690      | 1685      | 1688      |
| $\nu_{\text{as.C-H}}$                             | 2928,2975 | 2929,2976 | 2943,2978 | 2929,2977 | 2928,2977 | 2931,2978 | 2929,2978 |

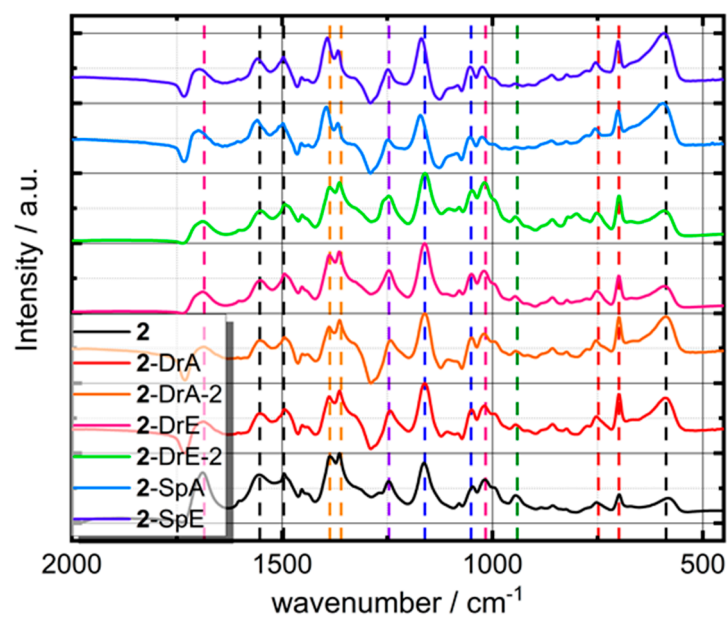

**Figure S6.** FTIR spectra for drop and spin coated films, **2** dissolved in ethanol (DrE and SpE) and acetonitrile (DrA and SpA) and double coated films from **2** dissolved in ethanol and acetonitrile for drop coated samples (**2**-DrE-2 and **2**-DrA-2).

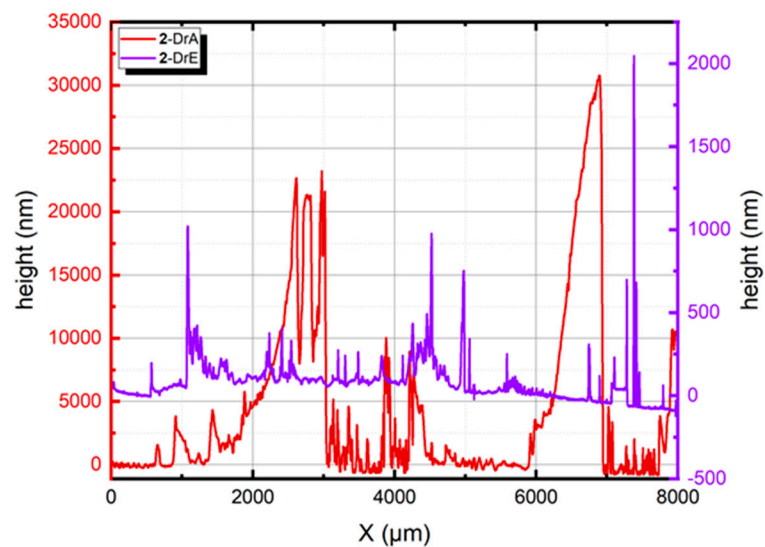

**Figure S7.** Profilometry of deposited films from bismuth oxido cluster **2** dissolved in ethanol (DrE) and in acetonitrile (DrA), respectively.

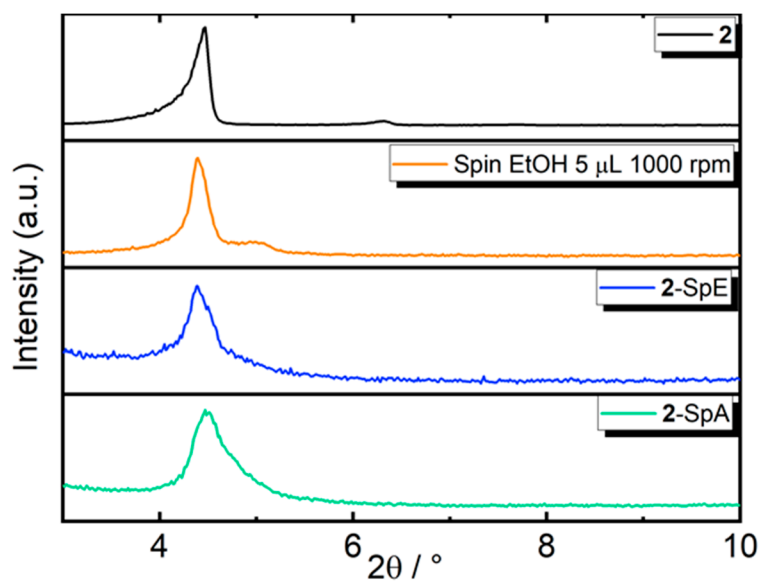

**Figure S8.** Comparison of XRD of compound **2** and drop coated films of **2** from ethanol (2-DrE) and acetonitrile (2-DrA) solution.

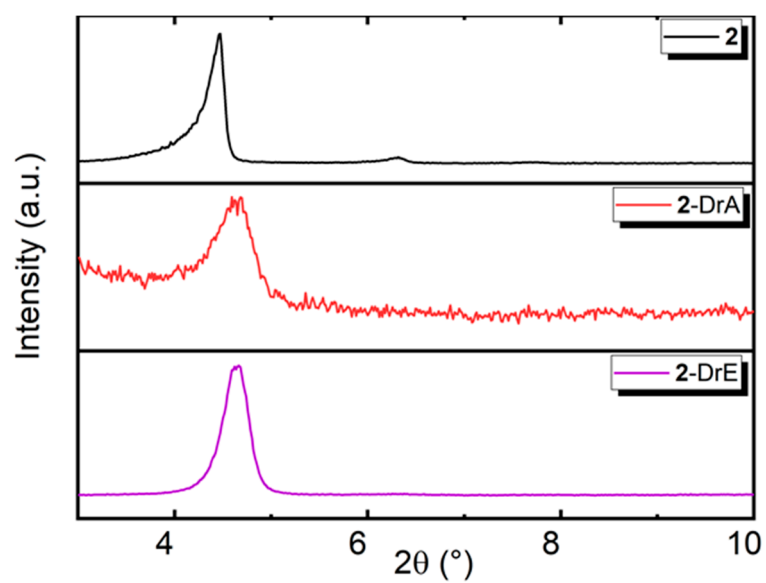

**Figure S9.** Comparison of XRD of compound **2**, spin coated samples of **2** from ethanol 5  $\mu$ l and 1000 rpm, ethanol with 20  $\mu$ l and 2000 rpm (**2**-SpE), and from acetonitrile 20  $\mu$ l and 2000 rpm (**2**-SpA) solution.
